# Supplementary material
Source: MDPI journal article supplement (https://www.mdpi.com/2073-4441/15/10/1948)
Supplement: s1 [file s1]

**Table S1.** Composition and mean abundance, ind. m<sup>-3</sup> ( $\pm$  SD) of mesozooplankton in the Bransfield Strait (BS), Antarctic Sound (AS), Weddell Sea (WS), and off the South Orkney Islands (SOI) during the austral summer of 2022.

| Taxon                                       | Study region        |                     |                     |                      |
|---------------------------------------------|---------------------|---------------------|---------------------|----------------------|
|                                             | BS                  | AS                  | WS                  | SOI                  |
| Amphipoda, <i>Themisto</i>                  |                     |                     |                     |                      |
| <i>gaudichaudii</i>                         | 2.06 $\pm$ 6.60     | 0.00                | 0.15 $\pm$ 0.20     | 0.24 $\pm$ 0.20      |
| <i>Primno macropa</i>                       | 0.34 $\pm$ 0.87     | 0.63 $\pm$ 0.48     | 0.10 $\pm$ 0.12     | 0.07 $\pm$ 0.15      |
| <i>Cyllopus magellanicus</i>                | 0.12 $\pm$ 0.30     | 0.00                | 0.00                | 0.07 $\pm$ 0.13      |
| Appendicularia                              | 0.00                | 0.00                | 0.29 $\pm$ 0.45     | 0.73 $\pm$ 0.93      |
| Chaetognatha                                | 3.36 $\pm$ 3.01     | 1.85 $\pm$ 2.21     | 1.82 $\pm$ 1.42     | 1.15 $\pm$ 0.70      |
| Copepoda, <i>Calanoides</i>                 |                     |                     |                     |                      |
| <i>acutus</i>                               | 29.02 $\pm$ 20.73   | 28.29 $\pm$ 19.32   | 61.35 $\pm$ 59.23   | 334.39 $\pm$ 219.07  |
| <i>Calanus propinquus</i>                   | 4.89 $\pm$ 4.04     | 4.15 $\pm$ 1.03     | 27.93 $\pm$ 41.34   | 134.16 $\pm$ 62.38   |
| <i>Calanus simillimus</i>                   | 7.68 $\pm$ 12.83    | 2.44 $\pm$ 3.05     | 1.46 $\pm$ 2.02     | 3.66 $\pm$ 1.99      |
| <i>Candacia</i> spp.                        | 0.00                | 0.00                | 0.00                | 1.49 $\pm$ 1.26      |
| <i>Euchirella rostromagna</i>               | 0.65 $\pm$ 1.56     | 0.00                | 2.63 $\pm$ 3.24     | 2.24 $\pm$ 2.21      |
| <i>Metridia gerlachei</i>                   | 138.25 $\pm$ 87.57  | 154.05 $\pm$ 136.25 | 69.51 $\pm$ 60.30   | 34.66 $\pm$ 22.51    |
| <i>Metridia</i> spp.                        | 0.09 $\pm$ 0.15     | 3.54 $\pm$ 4.99     | 1.34 $\pm$ 2.29     | 14.63 $\pm$ 19.27    |
| <i>Oithona</i> spp.                         | 381.83 $\pm$ 192.48 | 104.02 $\pm$ 9.14   | 170.91 $\pm$ 82.72  | 156.71 $\pm$ 79.32   |
| <i>Oncea</i> spp.                           | 16.76 $\pm$ 33.27   | 0.00                | 2.28 $\pm$ 2.87     | 4.98 $\pm$ 6.57      |
| <i>Paraeuchaeta antarctica</i>              | 4.48 $\pm$ 3.48     | 3.41 $\pm$ 2.07     | 2.55 $\pm$ 2.63     | 1.13 $\pm$ 1.66      |
| <i>Paraeuchaeta</i> spp.                    | 0.16 $\pm$ 0.24     | 0.00                | 0.00                | 0.00                 |
| <i>Rhincalanus gigas</i>                    | 7.88 $\pm$ 5.49     | 6.10 $\pm$ 4.48     | 28.86 $\pm$ 48.73   | 4.09 $\pm$ 3.75      |
| <i>Haloptilus oxycephalus</i>               | 0.56 $\pm$ 0.76     | 0.00                | 0.37 $\pm$ 0.55     | 0.62 $\pm$ 0.47      |
| Copepod nauplii                             | 3.73 $\pm$ 5.28     | 0.00                | 1.63 $\pm$ 3.02     | 0.00                 |
| <i>Euphausia superba</i><br>(eggs, nauplii) | 5.52 $\pm$ 4.47     | 405.37 $\pm$ 559.48 | 178.51 $\pm$ 162.10 | 279.76 $\pm$ 454.96  |
| <i>E. superba</i> (calyptopis)              | 2.35 $\pm$ 3.09     | 52.20 $\pm$ 65.54   | 58.19 $\pm$ 71.15   | 580.50 $\pm$ 402.73  |
| <i>E. superba</i> (furcilia)                | 0.49 $\pm$ 0.59     | 31.90 $\pm$ 40.98   | 7.68 $\pm$ 8.30     | 730.74 $\pm$ 517.22  |
| <i>E. triacantha</i>                        | 0.00                | 0.00                | 0.00                | 0.24 $\pm$ 0.49      |
| Ctenophora                                  | 0.00                | 1.46 $\pm$ 2.07     | 0.05 $\pm$ 0.12     | 0.00                 |
| Hydromedusae                                | 0.01 $\pm$ 0.09     | 0.00                | 0.03 $\pm$ 0.08     | 0.00                 |
| Ostracoda                                   | 11.51 $\pm$ 8.52    | 31.71 $\pm$ 3.45    | 23.63 $\pm$ 36.73   | 13.26 $\pm$ 9.12     |
| Pteropoda, <i>Limacina</i>                  |                     |                     |                     |                      |
| <i>helicina</i>                             | 0.42 $\pm$ 0.90     | 0.49 $\pm$ 0.62     | 0.33 $\pm$ 0.56     | 1.46 $\pm$ 0.83      |
| <i>Clione antarctica</i>                    | 0.00                | 0.00                | 0.00                | 0.12 $\pm$ 0.24      |
| <i>Spongiobranchaea</i><br><i>australis</i> | 0.13 $\pm$ 0.14     | 0.00                | 0.06 $\pm$ 0.06     | 0.10 $\pm$ 0.14      |
| Salpida, <i>Salpa</i><br><i>thompsoni</i>   | 1.18 $\pm$ 1.27     | 0.00                | 3.41 $\pm$ 5.09     | 2.18 $\pm$ 1.64      |
| <i>Ihlea racovitzai</i>                     | 0.13 $\pm$ 0.20     | 0.00                | 0.16 $\pm$ 0.30     | 0.07 $\pm$ 0.14      |
| Siphonophorae,<br><i>Dimophyes arctica</i>  | 0.30 $\pm$ 0.29     | 0.00                | 0.00                | 0.00                 |
| <i>Diphyes chamissonis</i>                  | 0.28 $\pm$ 0.31     | 0.00                | 0.24 $\pm$ 0.22     | 0.39 $\pm$ 0.40      |
| <i>D. dispar</i>                            | 0.15 $\pm$ 0.29     | 0.00                | 0.07 $\pm$ 0.12     | 0.00                 |
| Echinodermata, larvae                       | 0.51 $\pm$ 0.68     | 0.24 $\pm$ 0.34     | 0.00                | 0.02 $\pm$ 0.05      |
| Cirripedia, larvae                          | 24.57 $\pm$ 33.97   | 3.24 $\pm$ 2.31     | 4.23 $\pm$ 5.31     | 2.44 $\pm$ 4.88      |
| Polychaeta, larvae                          | 2.59 $\pm$ 2.10     | 7.12 $\pm$ 5.93     | 1.60 $\pm$ 0.87     | 80.35 $\pm$ 90.06    |
| Fish ova, larvae                            | 0.04 $\pm$ 0.09     | 0.00                | 0.00                | 0.00                 |
| Mean total abundance                        | 652.01 $\pm$ 470.86 | 842.22 $\pm$ 516.95 | 651.35 $\pm$ 549.64 | 2386.84 $\pm$ 300.05 |
